# Supplementary material
Source: PubMed Central journal article supplement (PMC2567469)
Supplement: 0806714105_Appendix_PDF.pdf [file 0806714105_Appendix_PDF.pdf]

# Supporting Text for Prevolutionary Dynamics

Martin A. Nowak & Hisashi Ohtsuki

Program for Evolutionary Dynamics, Department of Organismic and Evolutionary Biology, Department of Mathematics, Harvard University, Cambridge MA 02138, USA

## 1 Prolife

Prolife dynamics are given by

$$\dot{x}_i = a_i x_{i'} - (d + a_{i0} + a_{i1}) x_i. \quad (1)$$

The index  $i$  represents all binary strings (sequences). Longer strings are produced from shorter ones by adding 0 or 1 on the right side. Each string,  $i$ , has one precursor,  $i'$ , and two followers,  $i0$  and  $i1$ . For example, the precursor of string 0101 is 010; the two followers are 01010 and 01011. For the precursors of strings 0 and 1 we set  $x_{0'} = x_{1'} = 1$ . The constants  $a_i$  denote the rate at which string  $i$  arises from  $i'$  by addition of an activated monomer (which is either 0\* or 1\*). Eq.(1) assumes that the concentration of activated monomers is constant. All strings are removed (die) at rate  $d$ .

Prolife dynamics define a tree with the activated monomers at the root. The tree of prolife has infinitely many lineages. A lineage is a sequence of strings that follow each other. For example, one such lineage is 0, 00, 000, ....

At equilibrium, the right hand side of Eq.(1) is zero, so we obtain

$$x_i = b_i x_{i'}, \quad (2)$$

where  $b_i$  is given by

$$b_i = \frac{a_i}{d + a_{i0} + a_{i1}}. \quad (3)$$

Using Eq.(2) recursively gives us

$$x_i = b_i b_{i'} b_{i''} \cdots b_\sigma, \quad (4)$$

where  $\sigma$  is the ancestral monomer (0 or 1) of sequence  $i$ .

Let us consider super-symmetric prelife with  $a_0 = a_1 = \alpha/2$  and  $a_i = a$  for all other sequences,  $i$ . From Eq.(4), we obtain the following results.

The abundance of a sequence of length  $n$  is

$$x_n = \frac{\alpha}{2a} \left( \frac{a}{2a+d} \right)^n. \quad (5a)$$

The total abundance of all sequences of length  $n$  is

$$X_n = 2^n x_n = \frac{\alpha}{2a} \left( \frac{2a}{2a+d} \right)^n. \quad (5b)$$

The total abundance of all sequences is

$$X = \sum_{n=1}^{\infty} X_n = \frac{\alpha}{d}. \quad (5c)$$

The total abundance of all sequences in one lineage is

$$\tilde{X} = \sum_{n=1}^{\infty} x_n = \frac{\alpha}{2(a+d)}. \quad (5d)$$

The average sequence length is

$$\bar{n} = \frac{\sum_{n=1}^{\infty} n X_n}{X} = 1 + \frac{2a}{d}. \quad (5e)$$

Although there are infinitely many lineages, the abundance of any one lineage is a considerable fraction of the entire population. The reason is that short sequences belong to many lineages and they are much more abundant than long sequences.

## 2 Prelife landscape

Let us consider a random prelife landscape where reaction rates of sequences of length more than two are randomly given by

$$a_i = \begin{cases} a + s & \text{(with prob. } p) \\ a & \text{(with prob. } 1 - p). \end{cases} \quad (6)$$

The other parameters are the same as before:  $a_0 = a_1 = \alpha/2$ .

From Eq.(4), at equilibrium we obtain the following results. The average abundance of a sequence of length  $n$  is

$$\bar{x}_n = \frac{\alpha}{2} AB^n, \quad (7)$$

where

$$A = \frac{(2a + d)^2 + (2a + d)(3 - 2p)s + 2(1 - p)^2 s^2}{a(2a + d)^2 + (2a + d)(3a + pd)s + \{2a + p(2 - p)d\}s^2} \quad (8)$$

and

$$B = \frac{a(2a + d)^2 + (2a + d)(3a + pd)s + \{2a + p(2 - p)d\}s^2}{(2a + d)(2a + d + s)(2a + d + 2s)}. \quad (9)$$

A sequence is selected if its equilibrium abundance is not vanishing as  $s \rightarrow \infty$ . For sequence  $i$  of length  $n$ , rewriting Eq.(4) yields

$$x_i = \frac{1}{d + a_{i0} + a_{i1}} \cdot \underbrace{\frac{a_i}{d + a_{i'0} + a_{i'1}} \cdot \frac{a_{i'}}{d + a_{i''0} + a_{i''1}} \cdots \frac{a_{\sigma\rho}}{d + a_{\sigma0} + a_{\sigma1}}}_{n-1 \text{ terms}} \cdot \frac{\alpha}{2}, \quad (10)$$

where  $\sigma\rho$  represents the first two digits of sequence  $i$ . The first term in the right hand side of Eq.(10) is

$$\begin{cases} \frac{1}{(a+s)+(a+s)+d} \xrightarrow{s \rightarrow \infty} 0 & \text{(with prob. } p^2) \\ \frac{1}{(a+s)+a+d} \xrightarrow{s \rightarrow \infty} 0 & \text{(with prob. } 2p(1 - p)) \\ \frac{1}{a+a+d} \xrightarrow{s \rightarrow \infty} \frac{1}{a+a+d} & \text{(with prob. } (1 - p)^2). \end{cases} \quad (11)$$

The first term does not vanish with probability  $(1 - p)^2$ .

For each of the next  $n - 1$  terms on the right hand side of Eq.(10) we have

$$\left\{ \begin{array}{ll} \frac{a+s}{(a+s)+(a+s)+d} \xrightarrow{s \rightarrow \infty} \frac{1}{2} & \text{(with prob. } p^2) \\ \frac{a+s}{(a+s)+a+d} \xrightarrow{s \rightarrow \infty} 1 & \text{(with prob. } p(1-p)) \\ \frac{a}{(a+s)+a+d} \xrightarrow{s \rightarrow \infty} 0 & \text{(with prob. } p(1-p)) \\ \frac{a}{a+a+d} \xrightarrow{s \rightarrow \infty} \frac{1}{a+a+d} & \text{(with prob. } (1-p)^2). \end{array} \right. \quad (12)$$

Each term does not vanish with probability  $1 - p(1 - p)$ . Therefore, the probability that a sequence of length  $n$  is selected (does not vanish) is given by

$$(1-p)^2[1-p(1-p)]^{n-1}. \quad (13)$$

The expected number of sequences of length  $n$  that are selected is

$$2^n(1-p)^2[1-p(1-p)]^{n-1}. \quad (14)$$

For example, if  $a = 1, d = 1, \alpha = 1$  and  $p = 1/2$  as in Figure 2, we obtain from Eq.(7) for the average abundance of sequences of length  $n$

$$\bar{x}_n = \frac{18 + 12s + s^2}{36 + 42s + 11s^2} \left( \frac{36 + 42s + 11s^2}{12(3+s)(3+2s)} \right)^n. \quad (15)$$

Note that  $\bar{x}_n(s)$  a monotonically decreasing function (of  $s$ ) for  $n \leq 3$ , a one-humped function for  $3 < n < 12$ , and a monotonically increasing function for  $n \geq 12$ . From Eq.(14), the expected number of sequences of length  $n$  that survive for large  $s$  is given by  $(1/3)(3/2)^n$ .

### 3 Master sequence

In this section, we study the case where all reactions leading to one particular sequence (the master sequence) occur at the increased rate  $b$ , while all other reactions occur at rate  $a$ .

Suppose  $0^n = \underbrace{00 \cdots 0}_n$  is the master sequence. The reaction rates are given by

$$\begin{aligned} a_0 &= a_1 = \alpha/2 \\ a_i &= b \quad \text{for } i = 00, \cdots, 0^n \\ a_i &= a \quad \text{for other } i. \end{aligned} \quad (16)$$

From the general formula, Eq.(4), the abundances of sequences  $i = \underbrace{0 \cdots 0}_\ell \underbrace{1 * \cdots *}_m$  at equilibrium are given by

$$x_i = \begin{cases} \frac{\alpha}{2a} \left( \frac{a}{2a+d} \right)^m & \text{if } \ell = 0 \\ \frac{\alpha}{2b} \left( \frac{b}{a+b+d} \right)^\ell \left( \frac{a}{2a+d} \right)^m & \text{if } 1 \leq \ell \leq n-1 \\ \frac{\alpha}{2a} \left( \frac{b}{a+b+d} \right)^{n-1} \left( \frac{a}{2a+d} \right)^{\ell+m+1-n} & \text{if } \ell \geq n. \end{cases} \quad (17)$$

In particular, we are interested in the abundances of all sequences that have the same length as the master sequence. Let  $x_i$  denote the abundance of a sequence of the form  $\underbrace{0 \cdots 0}_i \underbrace{1 * \cdots *}_{n-i}$ . In this notation,  $x_n$  represents the abundance of the master sequence. From eq.(17), we obtain

$$x_i = \begin{cases} \frac{\alpha}{2a} \left( \frac{a}{2a+d} \right)^n & \text{if } i = 0 \\ \frac{\alpha}{2b} \left( \frac{b}{a+b+d} \right)^i \left( \frac{a}{2a+d} \right)^{n-i} & \text{if } 1 \leq i \leq n-1 \\ \frac{\alpha}{2a} \left( \frac{b}{a+b+d} \right)^{n-1} \left( \frac{a}{2a+d} \right) & \text{if } i = n. \end{cases} \quad (18)$$

Since  $b > a$ , we find

$$x_0 > x_1 < x_2 < \cdots < x_{n-1} < x_n \quad \text{and} \quad x_0 < x_n. \quad (19)$$

The master sequence is most abundant among all sequences of length  $n$ .

If  $b \rightarrow \infty$ , then the abundance of the master sequence converges to

$$x_{n,max} = \lim_{b \rightarrow \infty} x_n = \frac{\alpha}{2(2a + d)}. \quad (20)$$

Let us now calculate the condition for the abundance of the master sequence,  $x_n$ , to exceed a fraction,  $1/k$ , of the maximum value,  $x_{n,max}$ . From Eqs.(18) and (20), we have

$$\frac{\alpha}{2a} \left( \frac{b}{a + b + d} \right)^{n-1} \left( \frac{a}{2a + d} \right) > \frac{1}{k} \cdot \frac{\alpha}{2(2a + d)}. \quad (21)$$

This condition is rewritten as

$$b > \frac{a + d}{k^{\frac{1}{n-1}} - 1} \approx \frac{a + d}{\ln k} n \quad (n \gg 1). \quad (22)$$

Hence, for a master sequence of length  $n$  to make up a significant fraction of the population, the rate constant  $b$  must grow as a linear function of  $n$ .

#### 4 Master sequence with mutation

As before, we assume that all reactions leading to the master sequence occur at an increased rate,  $b$ , but there is a probability  $u$  of incorporating the wrong monomer. The rate of those reactions that stay within the lineage leading to the master sequence is given by  $b(1 - u)$ , while the reactions that come off the lineage occur at rate  $a + bu$ . We have

$$\begin{aligned} a_0 &= a_1 = \alpha/2 \\ a_i &= b(1 - u) \quad \text{for } i = 00, \dots, 0^n \\ a_i &= a + bu \quad \text{for } i = 01, \dots, 0^{n-1}1 \\ a_i &= a \quad \text{for all other } i. \end{aligned} \quad (23)$$

Consider sequences of the form  $i = \underbrace{0 \dots 0}_\ell \underbrace{1 * \dots *}_m$ . As always the asterisks represent either 0 or 1. From the general formula, Eq.(4), the equilibrium abundance of

sequence  $i$  is given by

$$x_i = \begin{cases} \frac{\alpha}{2a} \left( \frac{a}{2a+d} \right)^m & \text{if } \ell = 0 \\ \frac{\alpha}{2b(1-u)} \left( \frac{b(1-u)}{a+b+d} \right)^\ell & \text{if } 1 \leq \ell \leq n-1, m = 0 \\ \frac{\alpha}{2b(1-u)} \cdot \frac{a+bu}{a} \left( \frac{b(1-u)}{a+b+d} \right)^\ell \left( \frac{a}{2a+d} \right)^m & \text{if } 1 \leq \ell \leq n-1, m \geq 1 \\ \frac{\alpha}{2a} \left( \frac{b(1-u)}{a+b+d} \right)^{n-1} \left( \frac{a}{2a+d} \right)^{\ell+m+1-n} & \text{if } \ell \geq n. \end{cases} \quad (24)$$

Let us now compare the abundances of all sequences of length  $n$ . Let  $x_i$  denote the abundances of sequences of the form  $\underbrace{0 \cdots 0}_i \underbrace{1 * \cdots *}_{n-i}$ . In this notation, the abundance of the master sequence is given by  $x_n$ . From eq.(24), we obtain

$$x_i = \begin{cases} \frac{\alpha}{2a} \left( \frac{a}{2a+d} \right)^n & \text{if } i = 0 \\ \frac{\alpha}{2a} \cdot \frac{a+bu}{b(1-u)} \left( \frac{b(1-u)}{a+b+d} \right)^i \left( \frac{a}{2a+d} \right)^{n-i} & \text{if } 1 \leq i \leq n-1 \\ \frac{\alpha}{2a} \left( \frac{b(1-u)}{a+b+d} \right)^{n-1} \left( \frac{a}{2a+d} \right) & \text{if } i = n. \end{cases} \quad (25)$$

In order to understand the relative ranking of the equilibrium abundances of all sequences of length  $n$ , we must distinguish three cases.

**Case (i)**  $u < \frac{a}{2a+d}$ :

(i-a) If  $b < \frac{a(a+d)}{(a+d)-u(2a+d)}$  then  $x_0 < x_1 > x_2 > \cdots > x_{n-1} > x_n$ .

(i-b) If  $\frac{a(a+d)}{(a+d)-u(2a+d)} < b < \frac{a}{1-2u}$  then  $x_0 < x_1 < x_2 < \cdots < x_{n-1} > x_n$ .

(i-c) If  $\frac{a}{1-2u} < b < \frac{a^2}{a-u(2a+d)}$  then  $x_0 < x_1 < x_2 < \cdots < x_{n-1} < x_n$ .

(i-d) If  $b > \frac{a^2}{a-u(2a+d)}$  then  $x_0 > x_1 < x_2 < \cdots < x_{n-1} < x_n$  and  $x_0 < x_n$ .

**Case (ii)**  $\frac{a}{2a+d} \leq u < \frac{a+d}{2a+d}$ :

(ii-a) If  $b < \frac{a(a+d)}{(a+d)-u(2a+d)}$  then  $x_0 < x_1 > x_2 > \cdots > x_{n-1} > x_n$ .

(ii-b) If  $\frac{a(a+d)}{(a+d)-u(2a+d)} < b < \frac{a}{1-2u}$  then  $x_0 < x_1 < x_2 < \cdots < x_{n-1} > x_n$ .

(ii-c) If  $b > \frac{a}{1-2u}$  then  $x_0 < x_1 < x_2 < \cdots < x_{n-1} < x_n$ .

**Case (iii)**  $u \geq \frac{a+d}{2a+d}$ :

(iii-a) If  $b < \frac{a}{1-2u}$ , then  $x_0 < x_1 > x_2 > \cdots > x_{n-1} > x_n$ .

(iii-b) If  $b > \frac{a}{1-2u}$ , then  $x_0 < x_1 > x_2 > \cdots > x_{n-1} < x_n$  and  $x_1 > x_n$ .

**In summary**, the equilibrium abundance of the master sequence is

$$x_n = \frac{\alpha}{2(2a+d)} \left( \frac{b(1-u)}{a+b+d} \right)^{n-1}. \quad (26)$$

The master sequence is most abundant among all sequences of length  $n$  if

$$u < \frac{a+d}{2a+d} \quad \text{and} \quad b > \frac{a}{1-2u}. \quad (27)$$

If  $b \rightarrow \infty$ , then the abundance of the master sequence converges to

$$x_{n,max} = \lim_{b \rightarrow \infty} x_n = \frac{\alpha}{2(2a+d)} (1-u)^{n-1}. \quad (28)$$

For  $x_n$  to exceed a fraction,  $1/k$ , of this maximum value,  $x_{n,max}$ , we need

$$\frac{\alpha}{2(2a+d)} \left( \frac{b(1-u)}{a+b+d} \right)^{n-1} > \frac{1}{k} \cdot \frac{\alpha}{2(2a+d)} (1-u)^{n-1}, \quad (29)$$



which is simplified to

$$b > \frac{a+d}{k^{\frac{1}{n-1}} - 1} \approx \frac{a+d}{\ln k} n. \quad (n \gg 1). \quad (30)$$

If  $b \rightarrow \infty$  and  $u \rightarrow 0$ , then the abundance of the master sequence converges to

$$\hat{x}_{n,max} = \lim_{\substack{b \rightarrow \infty \\ u \rightarrow 0}} x_n = \frac{\alpha}{2(2a+d)}. \quad (31)$$

For  $x_n$  to exceed a fraction,  $1/k$ , of this maximum value,  $\hat{x}_{n,max}$ , we need

$$\frac{\alpha}{2(2a+d)} \left( \frac{b(1-u)}{a+b+d} \right)^{n-1} > \frac{1}{k} \cdot \frac{\alpha}{2(2a+d)}, \quad (32)$$

which is rewritten as

$$\left( \frac{a+b+d}{b(1-u)} \right)^{n-1} < k. \quad (33)$$

When  $b \gg a+d$ ,  $u \ll 1$  and  $n \gg 1$ , the left hand side of Eq.(33) is approximated by

$$\left[ \left( 1 + \frac{a+d}{b} \right) (1+u) \right]^n \approx \left( 1 + \frac{a+d}{b} + u \right)^n \approx \exp \left[ n \left( \frac{a+d}{b} + u \right) \right]. \quad (34)$$

Therefore condition (33) is simplified to

$$\frac{a+d}{b} + u < \frac{\ln k}{n}. \quad (35)$$

For  $u = 0$  we obtain the previous condition on  $b$ . For  $b \rightarrow \infty$  we obtain the error-threshold

$$u < \frac{\ln k}{n}. \quad (36)$$

The mutation rate of prelife must be less than the inverse of the sequence length, for the master sequence to reach a significant abundance in the population.

## 5 Replication

Let us assume that some sequences have the ability to replicate. Incorporating replication into prelife dynamics leads to the following differential equation:

$$\dot{x}_i = a_i x_{i'} - (d + a_{i0} + a_{i1})x_i + r x_i (f_i - \phi). \quad (37)$$

The first part of this equation describes prelife as before. The second part represents the standard selection equation. The coefficient,  $r$ , measures the relative contribution of selection dynamics in Eq.(37). The fitness of sequence  $i$  is given by  $f_i$ . The quantity,  $\phi$ , is an additional death rate, which cancels out the additional production of sequences by replication. From

$$\sum_i r x_i (f_i - \phi) = 0, \quad (38)$$

we have

$$\phi = \frac{\sum_i f_i x_i}{\sum_i x_i}. \quad (39)$$

In other words,  $\phi$  represents the average fitness of the population.

For  $r = 0$ , replication is absent and we recover prelife dynamics, Eq.(1). For  $r \rightarrow \infty$ , replication dominates and we obtain the standard selection dynamics.

We define the net reproductive rate of sequence  $i$  as

$$g_i \equiv r(f_i - \phi) - (d + a_{i0} + a_{i1}). \quad (40)$$

As in the main text, the sign of the net reproductive rate predicts a phase transition between prelife and life.

## 6 Replication with mutation

Imagine that sequence  $i$  of length  $n$  is the unique replicator, but its replication is susceptible to errors. In each elongation step a wrong monomer is attached with

probability  $u$ .

Let  $f_i$  be the fitness of the replicator in the absence of errors. As replication is error-free with probability  $(1 - u)^n$ , the realized fitness of the replicator becomes

$$(1 - u)^n f_i. \quad (41)$$

For the replicator to be selected, the net reproductive rate must be positive:

$$g_i = r\{(1 - u)^n f_i - \phi\} - (d + a_{i0} + a_{i1}) > 0. \quad (42)$$

By using

$$(1 - u)^n \approx \exp(-un) \quad (u \ll 1 \text{ and } n \gg 1), \quad (43)$$

and by neglecting  $\phi$  (which is very small at the error threshold), condition (42) can be rewritten as

$$u < \frac{1}{n} \log \left[ \frac{r f_i}{d + a_{i0} + a_{i1}} \right]. \quad (44)$$

Therefore, the replicator is selected if the mutation rate is less than the inverse of the sequence length.
